# Supplementary material for: Maternal B-vitamin and vitamin D status before, during, and after pregnancy and the influence of supplementation preconception and during pregnancy: Prespecified secondary analysis of the NiPPeR double-blind randomized controlled trial
Source: PubMed Central journal article supplement (PMC10697591; doi:10.1371/journal.pmed.1004260), 2023-12-05
Supplement: pmed.1004260.s010.pdf [file pmed.1004260.s010.pdf]

Nutritional Intervention Preconception and During Pregnancy to Maintain Healthy  
Glucose Metabolism and Offspring Health (“NiPPeR”): Study protocol for a  
randomised controlled trial

Keith M Godfrey<sup>a,b\*</sup> kmg@mrc.soton.ac.uk  
Wayne Cutfield<sup>c,d</sup> w.cutfield@auckland.ac.nz  
Shiao-Yng Chan<sup>e,f</sup> obgchan@nus.edu.sg  
Philip N Baker<sup>c,g</sup> philip.baker@leicester.ac.uk  
Yap Seng Chong<sup>e,f</sup> yap\_seng\_chong@nuhs.edu.sg  
NiPPeR Study Group

- a NIHR Southampton Biomedical Research Centre, University Hospital Southampton, NHS Foundation Trust, Southampton, UK
- b MRC Lifecourse Epidemiology Unit, University of Southampton, Southampton UK
- c Liggins Institute, University of Auckland, Auckland, New Zealand
- d A Better Start, New Zealand National Science Challenge, Auckland, New Zealand
- e Department of Obstetrics and Gynaecology, Yong Loo Lin School of Medicine, National University of Singapore and National University Health System, Singapore
- f Singapore Institute for Clinical Sciences, Agency for Science, Technology and Research, Singapore
- g College of Medicine, Biological Sciences and Psychology, University of Leicester, Leicester, UK

\* Chief Investigator  
Professor Keith Godfrey kmg@mrc.soton.ac.uk  
MRC Lifecourse Epidemiology Unit  
(University of Southampton)  
Southampton General Hospital, Mailpoint 95  
Southampton SO16 6YD United Kingdom

V1.11 7/10/2016

1 **Abstract**

2 **Background**

3 Improved maternal nutrition and glycaemic control before and during pregnancy is thought to  
4 benefit the health of the mother, with consequent benefits for infant body composition and  
5 later obesity risk. Maternal insulin resistance and glycaemia around conception and in early  
6 pregnancy may be key determinants of maternal physiology and placental function, affecting  
7 fetal nutrient supply and maternal-feto-placental communications throughout gestation, with  
8 implications for later postnatal health.

9  
10 **Methods**

11 This double blind randomized controlled trial will recruit up to 1800 women, aged 18-38 years,  
12 who are planning a pregnancy in the United Kingdom (UK), Singapore and New Zealand, with a  
13 view to studying 600 pregnancies. The primary outcome is maternal glucose tolerance at 28  
14 weeks' gestation following an oral glucose tolerance test. Secondary outcomes include  
15 metabolic, molecular and health-related outcomes in the mother and offspring, notably infant  
16 body composition. Participants will be randomly allocated to receive a twice-daily control  
17 nutritional drink, enriched with standard micronutrients, or a twice-daily intervention nutritional  
18 drink enriched with additional micronutrients, myo-inositol and probiotics both demonstrated  
19 previously to assist in maintaining healthy glucose metabolism during pregnancy. Myo-inositol is  
20 a nutrient that enhances cellular glucose uptake. The additional micronutrients seek to address  
21 deficiencies of some B-group vitamins and vitamin D that are both common during pregnancy  
22 and that have been associated with maternal dysglycaemia, epigenetic changes and greater  
23 offspring adiposity. Women who conceive within a year of starting the nutritional drinks will be  
24 followed through pregnancy and studied with their infants at six time points during the first year

25 of life. Blood, urine/stool, hair and cheek swabs will be collected from the mothers for genetic,  
26 epigenetic, hormone, nutrient and metabolite measurements, and assessments of the mother's  
27 body composition, anthropometry, health, diet and lifestyle will be made. Infants will also  
28 undergo hair, cheek swab, urine and stool sampling for similar biological measurements; infant  
29 body composition will be assessed and feeding recorded.

30

### 31 ***Discussion***

32 There is an increasing focus on the need to optimise maternal nutrition starting prior to  
33 conception. This trial will provide evidence on the potential for nutritional interventions beginning  
34 prior to conception to promote healthy maternal and offspring outcomes.

### 35 ***Trial registration***

36 This is an academic-led study by the EpiGen Global Research Consortium [ClinicalTrials.gov  
37 NCT02509988, Universal Trial Number U1111-1171-8056; 16/7/2015].

38

### 39 **Keywords:**

40 Preconception; Pregnancy; Randomised trial; Nutrition; Glucose metabolism; Metabolic diseases;

41 Hyperglycemia; Body composition

42

## 43 **Background**

44 There is now considerable concern about the maintenance of healthy glucose metabolism during  
45 pregnancy. This has arisen by extrapolation from the increasing number of women who develop  
46 type 2 diabetes during their reproductive years [1,2]. Epidemiological studies show that children  
47 born to mothers with type 1 or 2 diabetes also have a greater susceptibility to diabetes and  
48 obesity in later life [3,4]. That this risk is related to intra-uterine exposure to hyperglycaemia is  
49 shown by the observation that, among siblings, the risk of diabetes is higher in those born after  
50 the mother was diagnosed with diabetes [5]. These observations have been extended recently, as  
51 offspring exposed even to mild hyperglycaemia during pregnancy have increased adiposity and are  
52 at increased risk of later diabetes and cardiometabolic disease [6,7]. Through transgenerational  
53 perpetuation of the cycle of 'diabetes begetting diabetes', these factors are driving further  
54 escalation of the epidemic of non-communicable diseases [8,9].

55

56 The rising levels of maternal adiposity and obesity are of particular concern in both developed  
57 populations and those undergoing rapid socio-economic transitions [1,10,11]. Maternal obesity is  
58 associated with increased risk of short-term adverse pregnancy outcomes as well as longer term  
59 impact on offspring health [12], which have been postulated to be partly mediated by greater  
60 maternal insulin resistance and higher glycaemia. Both with and without clinically-recognised  
61 pregnancy complications, evidence shows that a child of a mother with higher glycaemia *per se*  
62 may suffer from exposure to a suboptimal environment *in utero*, reducing the likelihood of a  
63 healthy body composition in the offspring and predisposing to increased childhood adiposity  
64 [13,14]. Feeding pregnant rodents a high fat diet gives rise to maternal obesity and  
65 hyperglycaemia, and offspring who become overweight demonstrate abnormalities similar to the

66 human metabolic syndrome; these are associated with epigenetic changes such as altered DNA  
67 methylation at specific genetic loci implicated in metabolic functions [15].

68

69 Pregnancy represents a state of relative maternal insulin resistance, which helps promote the  
70 transfer of nutrients such as glucose, fatty acids and amino acids to the fetus [16]. Placental  
71 nutrient transfer is determined by the concentration gradient, blood flow and the operation of  
72 active and facilitated transporters [17]. However, in contrast to amino acids, there is no upper  
73 limit to placental transfer of glucose and consequent fetal adipose accretion as maternal blood  
74 glucose levels rise [13]; this may be viewed as adaptive, as, in the neonatal period, relative  
75 adiposity provides metabolic reserves for thermogenesis and critical organs in the event of  
76 inadequate maternal care [18]. However, excessive materno-placental glucose transfer is  
77 associated with fetal hyperinsulinemia and macrosomia [19,20] and an increased risk of fatal  
78 obstructed labour, suggesting that the levels of glucose exposure of the fetus that are often now  
79 experienced are novel in evolutionary terms [21].

80

81 Gestational diabetes mellitus (GDM) can be envisaged as the more extreme outcome of  
82 physiological processes, when maternal insulin resistance is accentuated by the woman's own  
83 developmental, genetic and environmental circumstances: for example, women who themselves  
84 had a lower birth weight [22] or carry genetic variants associated with type 2 diabetes [23,24] are  
85 at increased risk of GDM. Established risk factors for developing GDM include pre-pregnancy  
86 obesity [25], excessive gestational weight gain [26], advanced maternal age [27] and a previous  
87 pregnancy with GDM [28]. These factors are now increasingly common in women during their  
88 reproductive years with the evolutionary mismatched situation of over-nutrition and low levels of  
89 physical activity contributing not only to the rise in GDM but to the increasing prevalence of

90 obesity and diabetes in their children, perpetuating a vicious cycle of disease. Such changes in  
91 growth potential and metabolic status may be mediated by inheritable epigenetic alterations  
92 occurring *in utero* [29]. For example, in Canadian first nation peoples, up to 30% of the incidence  
93 of type 2 diabetes has its origin in GDM in the previous generation [30]. Higher blood glucose  
94 levels in pregnancy carry risk of cardiovascular disease for both the mother as well as the child, a  
95 risk which increases with each pregnancy [31].

96  
97 These findings have significant long-term implications for global public health. Now more than  
98 ever, effective strategies for maintaining healthy maternal glucose metabolism in pregnancy are  
99 needed. Such strategies would benefit both the mother in terms of a healthy pregnancy and her  
100 own metabolic health, and the offspring in terms of promoting healthy body composition and  
101 wellbeing.

102  
103 There is now data indicating that deficiency or low levels of certain micronutrients (vitamins B6,  
104 B12 and D, riboflavin) is extremely prevalent in pregnant women and has lasting effects on the  
105 offspring's risk of obesity, acting through epigenetic processes [32-34]. Evidence from South Asian  
106 pregnant women supports a role for the combination of maternal vitamin B12 deficiency and  
107 folate sufficiency in promoting offspring adiposity, most likely mediated through impaired  
108 maternal glucose tolerance during pregnancy [35,36]. Meta-analysis of observational studies  
109 strongly points to a role for maternal vitamin D deficiency in GDM [37], and additional vitamin D in  
110 pregnant women with GDM has been shown to have beneficial effects on glycaemia and total and  
111 LDL-cholesterol concentrations [38]. Low zinc intake and status has also been linked with maternal  
112 glycaemia [39], and we propose that maternal glucose tolerance may be on the causal pathway  
113 linking maternal micronutrient deficiency to offspring adiposity. Importantly, among the pregnant  
114 women that we studied in Southampton and Singapore there was a low prevalence of deficiency

115 in folate and iron, the two most common micronutrients currently targeted for supplementation  
116 in pregnancy, and neither was associated with altered epigenetic adiposity biomarkers or with the  
117 child's adiposity.

118

119 Dietary myo-inositol is found in free form but can also be generated by microbial action in the  
120 gastrointestinal tract from food sources of phosphatidylinositol and phytic acid and its salts [40].  
121 Myo-inositol is considered non-essential for mammals because it is synthesized de novo from  
122 glucose 6-phosphate in the kidney and other tissues [41,42]. Abnormalities in its metabolism have  
123 been associated with insulin-resistance and its depletion has been frequently observed in tissues  
124 affected by diabetic microvascular and neurological complications in animal models and human  
125 subjects [43]. Our current understanding of the molecular pathways of insulin action led to the  
126 hypothesis that the nutritionally derived myo-inositol may increase insulin sensitivity by making  
127 available more phosphatidylinositol and potentially inositol glycan secondary messengers [44,45].  
128 An increasing number of publications suggest that myo-inositol may reduce insulin resistance  
129 during pregnancy [46-49].

130

131 Recent studies suggest that specific bacteria may positively influence cardiometabolic parameters,  
132 possibly through their interaction with the host and the effect of microbial-derived metabolites.  
133 There is now substantial evidence implicating a role for the gut microbiome in affecting glucose  
134 metabolism [50], and probiotics may modulate glucose tolerance through balancing gut  
135 microbiota, normalizing increased intestinal permeability and lowering systemic and local low-  
136 grade inflammation [51]. There is preliminary evidence that a combination of probiotic strains

137 during pregnancy may promote the maintenance of healthy glucose metabolism during pregnancy  
138 [52].

139

140 Taken together, there is strong support for new intervention studies commencing before  
141 pregnancy to provide myo-inositol and probiotics, and to improve maternal vitamin B6, vitamin  
142 B12, vitamin D, and zinc status, aimed at optimising maternal glycaemia and glucose supply to the  
143 fetoplacental unit to promote healthy offspring growth and body composition.

144

#### 145 ***Aim***

146 This double blind randomized controlled trial in groups of women from different ethnic groups in  
147 the UK, Singapore and New Zealand is designed to examine the hypothesis that, compared with  
148 standard supplementation, a nutritional drink that contains myo-inositol, probiotics and additional  
149 micronutrients, commencing before conception and continuing during pregnancy, will assist in the  
150 maintenance of healthy glucose metabolism in the mother and promote offspring health.

151

#### 152 **Methods/Design**

##### 153 ***Trial design***

154 Increasing evidence points to the preconception period and early pregnancy as a critical time  
155 when impaired maternal glucose tolerance may lead to biological alterations in the placenta and  
156 fetus that result in increased postnatal adiposity in the offspring [53]. As a consequence of this  
157 important evidence, our trial uniquely will focus on recruitment before conception and  
158 intervention both before and during pregnancy. Substantial experimental evidence from animal  
159 studies indicates that preconception is a critical period in the lifecourse for interventions to reduce  
160 later risk of metabolic dysregulation in the offspring. In humans, large cohort studies have  
161 demonstrated that preconception is a time when factors contributing to later ill-health begin to



162 operate, as poor maternal and paternal diet and smoking before conception impact on  
163 development and long-term health of the offspring; to date, however, there are no population-  
164 based trials of preconception nutrition in developed communities.

165 The flow of the trial is shown in the SPIRIT Figure. Extensive biosampling and detailed phenotyping  
166 are embedded in the study with longitudinal assessments at multiple time-points starting from the  
167 preconception phase throughout pregnancy and into the first year post-delivery. The biosampling  
168 and phenotyping will enable detailed mechanistic insights and characterisation of potential new  
169 interventions for investigation in future studies. Following informed consent at the first  
170 preconception visit, a baseline standard 75 g oral glucose tolerance test will be conducted,  
171 nutritional status, lifestyle, mood, body anthropometry and metabolic phenotype ascertained and  
172 biosampling undertaken, followed by randomisation to the intervention or control drink. At the  
173 second preconception visit a month later, further biosampling will be undertaken and body  
174 composition assessed by DXA (dual-energy X-ray absorptiometry) scanning. Regular in-person and  
175 phone contact will be made with participants to resupply control/intervention drinks, and to  
176 encourage retention and compliance during the preconception phase. Participants who become  
177 pregnant within a year of commencing the intervention or control drink will be seen around 7, 12,  
178 20, 28 and 34 weeks of pregnancy for further phenotyping, biosampling and ultrasound scans  
179 assessing fetal growth and development. At 28 weeks gestation, a standard 75 g oral glucose  
180 tolerance test will be repeated to ascertain the primary outcome. Normal antenatal care will be  
181 permitted during the trial. The fathers will be interviewed to ascertain paternal lifestyle and mood,  
182 their anthropometry measured and paternal biosamples collected. At birth, offspring cord blood,  
183 umbilical cord and placental samples will be collected. Neonatal body composition is assessed by  
184 anthropometry, air displacement plethysmography (PEA POD) and, in a subsample, by DXA  
185 scanning. Both breast and formula-fed infants will be followed up when the infant is aged 1, 3 and

186 6 weeks, and 3, 6 and 12 months; infant feeding will be assessed in detail, biosamples collected,  
187 and growth and wellbeing ascertained. Breast milk samples will be collected from a subset of  
188 participants in early infancy for nutrient and metabolic analysis. A maternal oral glucose tolerance  
189 test will be repeated again at 6 months post-partum and repeat biosamples collected. The site  
190 visits will be completed at the research and hospital facilities of the three sites in Auckland  
191 (University of Auckland, Auckland, Waitemata and Counties Manukau District Health Boards and  
192 clinics, New Zealand), Singapore (National University Hospital and National University Health  
193 System Investigational Medicine Unit) and Southampton (National Institute for Health Research  
194 Wellcome Trust Southampton Clinical Research Facility and Princess Anne Hospital, University  
195 Hospital Southampton, UK).

#### 196 ***Recruitment***

197 Recruitment will be via self-referral of interested women who hear about the study via one or  
198 more of the following: a) local site advertisements in social (e.g. Facebook) and general (e.g. radio,  
199 local newspapers, magazines, posters) media, b) information brochures given to women engaging  
200 in community groups such as religious, culture-based or special-interest groups, c) information  
201 brochures given to women identified through or attending primary medical care, family planning  
202 or hospital clinics (for this group, eligible women may be contacted by a research nurse if they give  
203 permission to the clinic to pass on their contact details for this purpose).

204

205 Inclusion criteria are women who meet the following:

- 206 • Aged 18-38 years.
- 207 • Living in Southampton, Singapore or Auckland.
- 208 • In Southampton and Auckland, planning to have future maternity care in Southampton and  
209 Auckland respectively.

- 210 • In Singapore, willing to deliver at the National University Hospital.
- 211 • Women planning to conceive within 6 months (but conception up to 12 months after  
212 phenotyping will still be included).
- 213 • In Singapore only women of Chinese, Malay and Indian ethnicity, or of mixed  
214 Chinese/Malay/Indian ethnicity will be included.
- 215 • Able to provide written, informed consent.
- 216
- 217 Exclusion criteria are:
- 218 • Pregnant or lactating at recruitment (women who are currently breastfeeding will be excluded,  
219 but no washout period from the end of breastfeeding will be required before study start).
- 220 • Assisted fertility apart from those taking clomiphene or letrozole alone.
- 221 • Women with pre-existing type 1 or type 2 diabetes (fasting plasma glucose concentration  $\geq 7.0$   
222 mmol/l or post OGTT two hour plasma glucose concentration  $\geq 11.1$  mmol/l).
- 223 • Oral or implanted contraception currently or in the last month, or with an intra-uterine  
224 contraceptive device in situ.
- 225 • Metformin or systemic steroids currently or in the last month.
- 226 • Anticonvulsant medication currently or in the last month.
- 227 • Treatment for HIV, Hepatitis B or C currently or in the last month.
- 228 • Known serious food allergy.
- 229
- 230 Withdrawal criteria are:
- 231 • The participant wishes to discontinue participation in the study.
- 232 • The participant is unwilling or unable to comply with the protocol (including attendance at  
233 study visits, having study measures and biosampling).

- 234 • An overall uptake level of intervention/control nutritional drink of less than 60% evidenced  
235 by sachet counting.
- 236 • The participant is pregnant before or at preconception visit 2.
- 237 • The participant suffers a miscarriage (pregnancy loss before 24 weeks gestation) or ectopic  
238 pregnancy. If the participant suffers a first trimester pregnancy loss and wishes to re-join  
239 the study, she will be re-characterised as at the first baseline visit a month or more after a  
240 negative pregnancy test and will be assigned the nutritional drink with the same  
241 randomisation code as before.
- 242 • The participant presents with a multiple pregnancy (twins or other multiples).
- 243 • The infant dies in the perinatal period (for post-birth secondary outcomes).
- 244 • The participant suffers an adverse reaction which is deemed by the Investigator to be  
245 causally related to the intervention.
- 246 • The participant is withdrawn at the discretion of the Investigator for medical reasons.

247

248 For participants who withdraw during the pregnancy phase of the study, consent will be obtained  
249 to follow up on key outcome measures from their medical records to enable comparison of the  
250 characteristics of withdrawn and studied participants.

251

### 252 ***Randomisation procedure***

253 At preconception clinic visit 1 all eligible participants will be randomised via the electronic study  
254 database to either the nutritional drink or the control drink. This database will assign each  
255 participant the appropriate code number that is consistent with either the intervention nutritional  
256 drink arm or the control drink arm. Randomisation will be stratified by site to ensure balanced  
257 allocation of participants across the two arms at each of the three sites, with further stratification

258 by ethnicity. Investigational products will be blinded by the manufacturer with non-speaking codes  
259 that do not allow deduction of the identity of intervention or control drinks. Investigators, staff  
260 performing the assessments, and data analysts will remain blind to the identity of the allocation  
261 from the time of randomisation until either the participant is unblinded or database lock of the  
262 primary outcome occurs. If emergency unblinding is necessary, the process for this will be  
263 documented in the study Safety Monitoring Plan.

264

### 265 ***The intervention***

266 The Nutritional Intervention Preconception and During Pregnancy to Maintain Healthy Glucose  
267 Metabolism and Offspring Health (NiPPeR) intervention comprises: i) a micronutrient enriched  
268 nutritional drink containing myo-inositol, vitamin D, riboflavin, vitamin B6, vitamin B12 and zinc  
269 together with standard folic acid, iodine, calcium,  $\beta$ -carotene and iron; the quantities proposed  
270 are either standard amounts (myo-inositol [54]), enhanced amounts that are available in over the  
271 counter products (vitamins B6, B12, riboflavin), recommended daily allowance amounts in UK for  
272 pregnant women (vitamin D, zinc, folic acid, iodine) or minimal amounts for micronutrients linked  
273 with potential detrimental effects at higher doses (iron,  $\beta$ -carotene, calcium), and ii) probiotics  
274 (containing *Lactobacillus rhamnosus* NCC 4007 (CGMCC 1.3724) also known as LPR and  
275 *Bifidobacterium animalis* sp. *lactis* NCC 2818 (CNCM I-3446) also known as BI818) [52]. The  
276 intervention group will be compared with a control group who receives a drink containing  
277 standard amounts of micronutrients that are part of routine pregnancy care (including folic acid,  
278  $\beta$ -carotene, iron, calcium and iodine). The intervention is formulated as a powder in sachets to be  
279 made up in water immediately prior to consumption, with similar sensory characteristics for both  
280 the intervention and control drinks. The constituents of the intervention and control drinks are  
281 shown in Table 1, including the rationale for the amounts included.

282

283 This trial uses established nutritional elements for which tolerability is well established.  
284 Confirmation that the trial is not a Clinical Trial of an Investigational Medicinal Product has been  
285 secured from MedSafe (New Zealand), Medicines and Healthcare products Regulatory Agency,  
286 MHRA (UK) and the Health Sciences Authority (Singapore).

287

### 288 ***Outcome measurements***

289 The primary analysis will adjust for site, ethnicity and preconception glycemia to account for  
290 potential imbalance between treatment arms amongst pregnancies which reach 28 weeks  
291 gestation, examining for differences in means between the control and intervention groups for the  
292 primary endpoint, specifically the fasting and/or 60 minute and/or 2 hour glucose concentrations  
293 following an oral 75g glucose tolerance test at 28 weeks gestation. Maternal glucose metabolism  
294 at 28 weeks' gestation has been chosen as the primary outcome as there is evidence that  
295 maintaining normal carbohydrate metabolism during pregnancy is associated with a healthier  
296 body composition, a reduced risk of obesity and potentially promotion of allergic/respiratory  
297 health in the children [55], alongside the recognised pregnancy benefits for the mother.

298

299 Secondary maternal outcomes of the initial phase of the NiPPeR study are:

300 1. Maintenance of a healthy pregnancy, including normal duration of gestation ( $\geq 37.0$  weeks  
301 gestation), absence of GDM (defined using the International Association of the Diabetes and  
302 Pregnancy Study Groups criteria: glucose cut-off values of  $\geq 5.1$  mmol/L for fasting plasma glucose,  
303 and/or  $\geq 10.0$  mmol/L for 1-hour and/or  $\geq 8.5$  mmol/L for 2-hour post load), change in fasting  
304 glucose and OGTT glucose area under the curve from preconception baseline to 28 weeks  
305 gestation, maternal wellbeing/mood, absence of excessive nausea and vomiting, adequate  
306 pregnancy weight gain (Institute of Medicine criteria) and vaginal delivery rates.

307 2. Reduction in maternal micronutrient insufficiency, specifically less riboflavin, vitamin B6,  
308 vitamin B12, zinc and vitamin D insufficiency, before and during pregnancy

309 3. Alteration in gut microbiota consistent with enhanced wellbeing.

310 4. Alteration in maternal metabolomic and epigenetic biomarkers consistent with improved  
311 maternal and/or offspring wellbeing.

312 5. Enhancement of breast milk micronutrient content, altered immunological factors,  
313 epigenetic and metabolomic profiles (subsample), and maintenance of healthy lactogenesis.

314

315 Secondary offspring outcomes of the initial phase of the NiPPeR study are:

316 1. Neonatal adiposity measured by PEA POD.

317 2. Birthweight 2,500-4,000 g, size for gestational age at birth and customised birthweight  
318 centile.

319 3. Reduced adiposity gain during infancy, analysed taking account of infant feeding.

320 4. Reduction in cord blood C-peptide as a marker of overall glycaemia during gestation.

321 5. Promotion of offspring wellbeing and healthy cardiometabolic risk factors, including  
322 visceral adiposity and markers of insulin resistance, during infancy.

323 6. Alteration in offspring metabolomic and epigenetic biomarkers in perinatal samples,  
324 consistent with improved infant metabolic and allergic wellbeing.

325 7. Alteration in gut microbiota to a microbiota associated with infant metabolic and allergic  
326 wellbeing.

327

328 ***Data and biosample collection***

329 Study data will be collected by trained research staff using an access controlled web based  
330 database (MedSciNet, Stockholm) managed with support from the data management staff of the  
331 MRC Lifecourse Epidemiology Unit and the Singapore Institute for Clinical Sciences. The study  
332 database will not hold personal information, which will be stored separately at each institution  
333 with access limited to study co-ordinators. Data from the web based database will be downloaded  
334 via a dedicated computer and stored securely on the MRC Lifecourse Epidemiology Unit's servers  
335 in the UK. Data extracts will be provided for analysis by the study researchers treating data from  
336 all three sites as a single study. All data will be kept in accordance with the UK Data Protection Act,  
337 and applicable regulations and guidance of each country and institution.

338

339 Biological samples will be collected and processed using standardised consumables, equipment  
340 and protocols across the three sites and will be being stored in accordance with the UK Human  
341 Tissue Act or equivalent at each institution in appropriately regulated biobanks. The study  
342 database allows management of the samples. All analysis will be carried out on anonymised data  
343 and samples. Accredited laboratories will be used for measurement of the primary outcome of  
344 plasma glucose concentrations.

345

346 ***Study management and governance***

347 This double blind randomized controlled trial is led by investigators from the EpiGen Global  
348 Research Consortium, an academic research consortium comprising from the University of  
349 Southampton (MRC Lifecourse Epidemiology Unit and Institute of Developmental Sciences),  
350 University of Auckland (Liggins Institute), the Growth, Development, and Metabolism programme  
351 of the Singapore Institute for Clinical Sciences (an operating unit of A\*STAR) and the National  
352 University of Singapore (Translational and Clinical Research Flagship Programme, `Developmental



353 pathways to metabolic disease'), together with the Singapore National University Health System.  
354 Scientists from the Nestlé Research Center (Nestec) provided advice on aspects of the intervention  
355 formulation.

356 The UK sponsor of the project is the University of Southampton; the New Zealand sponsor of the  
357 project is Auckland UniServices Limited; the Singapore sponsor of the project is the National  
358 University Hospital Singapore. The sponsors are indemnified for any harms arising from trial  
359 participation and will approve protocol amendments for which ethics approval has been secured,  
360 alongside update of trial registry entries. Trial oversight will be provided by an Independent Data  
361 Monitoring and Safety Committee. The day to day running of the study will be through the Trial  
362 Management Group, consisting of the Principal Investigators and Clinical Trial Operations Director,  
363 who will be responsible for all decisions on the study management and delivery.

364  
365 Monitoring will be carried out several times per year by an external, independent monitor at each  
366 site, following the risk-based monitoring plan established for the study, overseen by the Study  
367 Sponsor. Safety reporting will be in accordance with the study Safety Monitoring Plan and all events  
368 will be recorded in the study database. An Independent Data Monitoring and Safety Committee  
369 has been established for the trial. This committee is independent from the sponsor and competing  
370 interests and will meet annually and oversee all ethical and safety issues in accordance with  
371 current regulations and MRC guidelines for Data Monitoring Committees. The Committee charter  
372 is available from the Clinical Trial Operations Director, who will coordinate and review activity  
373 across sites.

374

375 **Statistical analysis**

376 The primary analysis will be according to the intention to treat principle. Additionally, *a priori*  
377 sensitivity analyses will be undertaken, omitting participants withdrawn as a consequence of  
378 reluctance to continue with the trial, conception after taking the nutritional drink for <21 days,  
379 less than 60% uptake with the intervention (evidenced by sachet counting), not conceiving after  
380 12 months of participation or not achieving a pregnancy >28 weeks. Further sensitivity analyses  
381 using a 'per protocol' or an 'as treated' analysis will be performed if deemed appropriate by the  
382 trial statisticians. For analysis of the primary endpoint only: if exploratory analysis reveals the  
383 presence of outliers, as identified by independent experts and/or the trial statisticians, sensitivity  
384 analysis will be performed excluding these outliers. Analyses will be specified in the study  
385 statistical analysis plan finalised by the Trial Management Group before unblinding the data. The  
386 influence of missing data will be examined using multiple imputation techniques. There are no  
387 formal planned interim analyses of the primary outcome, but progress reports on all data issues  
388 will be presented to the Independent Data Monitoring and Safety Committee, who will agree their  
389 charter at their first meeting. Analyses of the baseline phenotypic data that do not require  
390 unblinding will be undertaken. We will build prognostic models using baseline covariates on the  
391 primary outcome of maternal glucose tolerance in pregnancy. Planned subgroup analyses will  
392 include stratification by ethnicity across study sites.

393

394 **Power calculations**

395 By studying up to 900 pre-pregnant participants in each of the intervention and control groups, a  
396 total of 600 pregnancies and 500 live births is conservatively anticipated, following attrition from  
397 miscarriage, ectopic pregnancy, perinatal demise, multiple pregnancy, voluntary participant  
398 withdrawal, inability to comply with the protocol, withdrawal for medical reasons at the discretion  
399 of the investigator and loss-to-follow-up. A study of 250 pregnancies with 28 week OGTT data in

400 each group has 89% power to detect a 0.1 mmol/L reduction in fasting plasma glucose and 84%  
401 power to detect a 0.3 mmol/L reduction in 2 hour plasma glucose at the 5% level of significance. In  
402 the Hyperglycemia and Adverse Pregnancy Outcomes (HAPO) study such changes in glucose  
403 concentrations were associated with >10% changes in the odds of macrosomia and sum of  
404 neonatal skinfolds >90th centile and with a >20% change in cord C-peptide >90th centile [6]. As a  
405 further illustration of statistical power, using the distribution of 60 minute plasma glucose in the  
406 HAPO study, a study of 250 participants in each of the two groups has 80% power to detect a  
407 difference of  $\geq 0.43$  mmol/L in 60 minute glucose at  $P < 0.05$ . A study of 300 pregnancies in each  
408 arm will have an 80% power to detect a reduction in the mean plasma glucose of 0.12, 0.45 and  
409 0.34 mmol/L at fasting, 60 minutes and 2 hours respectively with an alpha of 0.017 taking into  
410 account multiple testing.

411

## 412 **Discussion**

413 This double blind randomized controlled trial in groups of women from different ethnic groups in  
414 the UK, Singapore and New Zealand is designed to examine the hypothesis that a nutritional drink,  
415 commencing before conception and continuing during pregnancy, will assist in the maintenance of  
416 healthy glucose metabolism in the mother and promote offspring health. Improved maternal  
417 nutrition and glycaemic control before and during pregnancy has benefits for the health of the  
418 mother and her offspring, including healthy offspring body composition, and decreased risks of  
419 childhood obesity and allergies. The intervention group will receive a nutritional drink enriched  
420 with micronutrients, myo-inositol and probiotics, and the control group will receive a drink  
421 enriched with standard micronutrients. The potential for adverse effects of the intervention is low  
422 as the probiotic and myo-inositol are thought to exert their main effects through physiological  
423 modulation of maternal metabolism rather than through direct effects on the fetus and, while the

424 amounts of micronutrients in the nutritional drink are sufficient to rectify maternal deficiency,  
425 they do not exceed UK, Singapore and New Zealand safe upper limits.

426

427 The trial commences preconception as studies by Catalano *et al* [53] suggest that a major part of  
428 the risk of macrosomia originates in early pregnancy/pre-pregnancy and adverse pregnancy  
429 outcomes are associated with poor maternal nutrition at conception; maternal insulin resistance  
430 and hyperglycaemia in the very earliest stages of pregnancy alter placental anatomy and  
431 physiology in ways that persistently affect transplacental fetal nutrient supply and fetal fat  
432 accretion, as well as bilateral maternal-feto-placental cross-talk, with consequences for later post-  
433 natal health. As a consequence, intervention commencing in established pregnancy can only  
434 partially influence fetal growth and development. The earlier maternal glycaemia is optimised and  
435 micronutrient deficiencies prevented, the greater the likelihood of maintaining fetal and postnatal  
436 health and wellbeing. Many influential governmental and non-governmental organizations are  
437 now stressing the importance of optimising preconception nutrition in general terms but as yet,  
438 other than folic acid to prevent neural tube defects, there are few preconception interventions  
439 that are recognized as promoting health benefits for the mother or offspring, and none, apart  
440 from folic acid, has a robust evidence base.

441

442 In the initial phase of the NiPPeR study a broad range of maternal nutritional assessments,  
443 potential epigenetic mechanisms and secondary measures relating to pregnancy outcomes and  
444 infant growth, body composition and wellbeing will be characterised and are detailed in this  
445 protocol.

446

447 The extensive biosampling and detailed phenotyping embedded in the study before, during and  
448 after pregnancy will provide an important discovery pipeline for the development of novel

449 biomarkers of maternal and offspring wellbeing, and lead to new interventions, and future  
450 guidelines to promote healthy human growth and development. A range of biological samples  
451 collected at multiple time points before, during and after pregnancy in the mother and offspring  
452 enables a systems biology approach to understanding the complex interaction of factors that  
453 determine maternal and infant wellbeing. Both individually and collectively, the control and  
454 intervention arms will provide extensive information that will deliver new knowledge on how  
455 maternal nutrition and metabolic state can promote offspring health. The research will also  
456 benefit from insights arising from other studies by the EpiGen Global Research Consortium in the  
457 UK, Singapore and New Zealand. The ethnicities of the participants in the study will allow broad  
458 extrapolation of the findings, and enable subsequent smaller scale studies in other jurisdictions  
459 such as China and India as appropriate. The partners have extensive experience of following up  
460 prospective mother-offspring cohorts, maternal, obstetrical, fetal and infant medicine and health  
461 care, and detailed characterisation of a comprehensive set of health and wellbeing outcomes  
462 through infancy and childhood will be undertaken. The data collected will allow determination of  
463 the contributions of nutritional and lifestyle factors, socioeconomic status, ethnicity, genetics,  
464 transcriptomics, epigenomics, metabolomics and metagenomics to maintaining healthy glucose  
465 metabolism in pregnancy and promoting healthy growth, body composition and wellbeing in the  
466 offspring.

467

468 ***Trial status***

469 Recruitment for the trial commenced on 3/8/2015; more than half of the participants have been  
470 recruited within the following 12 months and recruitment is ongoing in October 2016. Participants  
471 have already progressed through the randomisation and pregnancy phases of the study and initial  
472 deliveries have occurred in all three sites.

473

474 **List of abbreviations**

475 **GDM:** Gestational diabetes mellitus, **HAPO:** Hyperglycemia and Adverse Pregnancy Outcomes,

476 **NiPPeR Study:** Nutritional Intervention Preconception and During Pregnancy to Maintain Healthy

477 Glucose Metabolism and Offspring Health Study, **UK:** United Kingdom

478

479 **Declarations**

480 ***Ethics approval and consent to participate***

481 After independent full external peer review the study protocol and subsequent amendments have

482 been approved by the research ethics committees at each of the three study sites (Southampton:

483 Health Research Authority NRES Committee South Central Research Ethics Committee (REC),

484 reference 15/SC/0142), the Health and Disability Ethics Committee (HDEC) (New Zealand)

485 reference 15/NTA/21 and the National Healthcare Group Domain Specific Review Board (NHG

486 DSRB) (Singapore) reference 2015/00205). The trial is an academic led study registered at

487 ClinicalTrials.gov (NCT02509988), Universal Trial Number U1111-1171-8056. It has received

488 intramural/infrastructure funding support at each of the three sites (UK Medical Research Council

489 (MC\_UU\_12011/4); Singapore National Medical Research Council (NMRC/TCR/012-NUHS/2014);

490 Gravidia (National Centre for Growth and Development, New Zealand, no reference number)), with

491 co-funding from Nestec Ltd (RDCU000485), who have formulated the trial intervention.

492 Information sheets are provided to potential participants ahead of them being approached for

493 consent by research staff. This study is being conducted in compliance with the protocol, Good  
494 Clinical Practice and the applicable regulatory requirements.

495

496 ***Consent for publication***

497 Not applicable

498

499 ***Availability of data and material***

500 A Trial Consultative Panel comprising senior representatives from the academic institutions

501 undertaking the study and the industry partner has been set up and will consider associated

502 studies requesting access to data and materials. This manuscript does not contain any data.

503 Datasets during and/or analysed during the study will be available from the corresponding author

504 on reasonable request. The results of the study will be submitted for publication in peer reviewed

505 journals as soon as possible after analysis. Authorship will be in line with international guidelines

506 ([http://www.icmje.org/recommendations/browse/roles-and-responsibilities/defining-the-role-of-](http://www.icmje.org/recommendations/browse/roles-and-responsibilities/defining-the-role-of-authors-and-contributors.html)

507 [authors-and-contributors.html](http://www.icmje.org/recommendations/browse/roles-and-responsibilities/defining-the-role-of-authors-and-contributors.html)).

508

509 ***Competing interests***

510 KMG has received reimbursement for speaking at conferences sponsored by companies selling

511 nutritional products. KMG, WSC, CYS and SYC are part of an academic consortium that has

512 received research funding from Abbott Nutrition, Nestec and Danone.

513

514 ***Funding statement***

515 Public good funding for this investigator-led study is through the UK Medical Research Council (as

516 part of an MRC award to the MRC Lifecourse Epidemiology Unit), the Singapore Government (as

517 part of the Growth, Development and Metabolism Programme of the Singapore Institute for

518 Clinical Sciences) and the New Zealand Government (as part of the Gravidia, Centre of Research  
519 Excellence: Growth and Development). Funding for provision of the intervention and control  
520 drinks and to cover aspects of the fieldwork for the study has been provided by Nestec SA under a  
521 Research Agreement with the University of Southampton, Auckland UniServices Ltd, Singapore  
522 Institute for Clinical Sciences, National University Hospital Singapore PTE Ltd., National University  
523 of Singapore.

524

### 525 **Author's roles**

526 The concept for the study and its design was originated by KMG, CYS and PNB, with important  
527 inputs into the study design, protocol, standard operating procedures and delivery of the  
528 programme by SYC, WSC and the individuals in the NiPPeR Study Group. As Chief Investigator,  
529 KMG leads research planning and delivery across all three sites. KMG, WSC, SYC, PNB and CYS are  
530 Principal Investigators on the study Trial Management Group, which manages study delivery at the  
531 three sites, data analysis and interpretation and manuscript preparation. The manuscript was  
532 drafted by KMG, WSC, SYC, PNB and CYS. All authors have contributed to the draft protocol,  
533 approved the final manuscript and gave consent for its publication.

534

### 535 **Acknowledgements**

536 We would like to thank the participants for their enthusiastic involvement in the study.



## References

1. Ferrara A. Increasing prevalence of gestational diabetes mellitus: a public health perspective. *Diabetes Care* 2007; 30 Suppl 2:S141-146.
2. Reece EA, Leguizamon G, Wiznitzer A. Gestational diabetes: the need for a common ground. *Lancet* 2009; 373:1789-1797.
3. Poston L. Developmental programming and diabetes - The human experience and insight from animal models. *Best Pract Res Clin Endocrinol Metab* 2010; 24:541-552.
4. Simeoni U, Barker DJ. Offspring of diabetic pregnancy: long-term outcomes. *Semin Fetal Neonatal Med* 2009; 14:119-124.
5. Dabelea D, Hanson RL, Lindsay RS, Pettitt DJ, Imperatore G, Gabir MM, Roumain J, Bennett PH, Knowler WC. Intrauterine exposure to diabetes conveys risks for type 2 diabetes and obesity: a study of discordant sibships. *Diabetes* 2000; 49:2208-2211.
6. Hyperglycemia and Adverse Pregnancy Outcome (HAPO) Study: associations with neonatal anthropometrics. *Diabetes* 2009; 58:453-459.
7. Tam WH, Ma RC, Yang X, Li AM, Ko GT, Kong AP, Lao TT, Chan MH, Lam CW, Chan JC. Glucose intolerance and cardiometabolic risk in adolescents exposed to maternal gestational diabetes: a 15-year follow-up study. *Diabetes Care* 2010; 33:1382-1384.
8. Ma RC, Chan JC. Pregnancy and diabetes scenario around the world: China. *Int J Gynaecol Obstet* 2009;104 Suppl 1:S42-5.
9. Yajnik CS. Fetal programming of diabetes: still so much to learn! *Diabetes Care* 2010; 33:1146-1148.
10. Ramachandran A, Ma RC, Snehalatha C: Diabetes in Asia. *Lancet* 2010; 375:408-418.
11. Chan JC, Malik V, Jia W, Kadowaki T, Yajnik CS, Yoon KH, Hu FB. Diabetes in Asia: epidemiology, risk factors, and pathophysiology. *JAMA* 2009; 301:2129-2140.
12. Godfrey KM, Reynolds RM, Prescott SL, Nyirenda M, Jaddoe VWV, Eriksson JG, Broekman BFP. The influence of maternal obesity on the long-term health of the offspring. *The Lancet Diabetes & Endocrinology* 2017;5:53-64.
13. Aris IM, Soh SE, Tint MT, Liang S, Chinnadurai A, Saw SM, Rajadurai VS, Kwek K, Meaney MJ, Godfrey KM, Gluckman PD, Yap FK, Chong YS, Lee YS. Effect of maternal glycemia on neonatal adiposity in a multiethnic Asian birth cohort. *J Clin Endocrinol Metab.* 2014;99:240-7.
14. Zhao P, Liu E, Qiao Y, Katzmarzyk PT, Chaput JP, Fogelholm M, Johnson WD, Kuriyan R, Kurpad A, Lambert EV, Maher C, Maia JA, Matsudo V, Olds T, Onywera V, Sarmiento OL, Standage M, Tremblay MS, Tudor-Locke C, Hu G; ISCOLE Research Group. Maternal gestational diabetes and childhood obesity at age 9-11: results of a multinational study. *Diabetologia.* 2016;59:2339-48.
15. Dudley KJ, Sloboda DM, Connor KL, Beltrand J, Vickers MH. Offspring of mothers fed a high fat diet display hepatic cell cycle inhibition and associated changes in gene expression and DNA methylation. *PLoS One* 2011; 6:e21662.
16. Lain KY, Catalano PM. Metabolic changes in pregnancy. *Clin Obstet Gynecol* 2007; 50:938-948.

17. Lewis RM, Demmelmair H, Gaillard R, Godfrey KM, Hauguel-de Mouzon S, Huppertz B, Larque E, Saffery R, Symonds ME, Desoye G. The placental exposome: placental determinants of fetal adiposity and postnatal body composition. *Ann Nutr Metab* 2013;63:208-215.
18. Kuzawa CW. Fetal origins of developmental plasticity: are fetal cues reliable predictors of future nutritional environments? *Am J Hum Biol* 2005; 17:5-21.
19. Susa JB, Schwartz R. Effects of hyperinsulinemia in the primate fetus. *Diabetes* 1985; 34 Suppl 2:36-41.
20. de Santis MS, Taricco E, Radaelli T, Spada E, Rigano S, Ferrazzi E, Milani S, Cetin I. Growth of fetal lean mass and fetal fat mass in gestational diabetes. *Ultrasound Obstet Gynecol* 2010; 36:328-337.
21. Godfrey KM, Haugen G, Kiserud T, Inskip HM, Cooper C, Harvey NCW, Crozier SR, Robinson SM, Davies L, the Southampton Women's Survey Study Group, Hanson MA. Fetal liver blood flow distribution: role in human developmental strategy to prioritize fat deposition versus brain development. *PLoS One* 2012;7:e41759.
22. Egeland GM, Skjaerven R, Irgens LM. Birth characteristics of women who develop gestational diabetes: population based study. *BMJ* 2000; 321:546-547.
23. Lauenborg J, Grarup N, Damm P, Borch-Johnsen K, Jorgensen T, Pedersen O, Hansen T. Common type 2 diabetes risk gene variants associate with gestational diabetes. *J Clin Endocrinol Metab* 2009;94:145-150.
24. Konig M, Shuldiner AR. The genetic interface between gestational diabetes and type 2 diabetes. *J Matern Fetal Neonatal Med* 2011, 25(1):36-40.
25. Graves E, Hill DJ, Evers S, et al. The impact of abnormal glucose tolerance and obesity on fetal growth. *J Diabetes Res* 2015; 2015:847674.
26. Gibson KS, Waters TP, Catalano PM. Maternal weight gain in women who develop gestational diabetes mellitus. *Obstet Gynecol* 2012; 119:560-565.
27. Solomon CG, Willett WC, Carey VJ, et al. A prospective study of pregravid determinants of gestational diabetes mellitus. *JAMA* 1997; 278:1078-1083.
28. Schwartz N, Nachum Z, Green MS. The prevalence of gestational diabetes mellitus recurrence - effect of ethnicity and parity: a meta-analysis. *Am J Obstet Gynecol* 2015; 213:310-317.
29. Godfrey KM, Costello PM, Lillycrop KA. The developmental environment, epigenetic biomarkers and long-term health. *J Devel Origins Health Dis* 2015;6: 399-406.
30. Dowse GK, Zimmet PZ, Finch CF, Collins VR: Decline in incidence of epidemic glucose intolerance in Nauruans: implications for the "thrifty genotype". *Am J Epidemiol* 1991, 133:1093-1104.
31. Sattar N, Greer IA: Pregnancy complications and maternal cardiovascular risk: opportunities for intervention and screening? *BMJ* 2002; 325:157-160.
32. Crozier SR, Harvey NC, Inskip HM, Godfrey KM, Cooper C, Robinson SM, SWS Study Group. Maternal vitamin D status in pregnancy is associated with adiposity in the offspring. Findings from the Southampton Women's Survey. *Am J Clin Nutrition* 2012;96:57-63.
33. Godfrey KM, Sheppard A, Gluckman PD, Lillycrop KA, Burdge GC, McLean C, Rodford J, Slater-Jefferies JL, Garratt E, Crozier SR, Emerald BS, Gale CR, Inskip HM, Cooper C, Hanson MA.

Epigenetic gene promoter methylation at birth is associated with child's later adiposity. *Diabetes* 2011;60:1528-34.

34. Childs C, Titcombe P, Crozier S, Barton S, Harvey N, Cooper C, Inskip H, Godfrey K. Low B-vitamin status during pregnancy is associated with greater offspring adiposity in childhood. *J Devel Origins Health Dis* 2015; 6 (suppl 2): S36.

35. Yajnik CS, Deshpande SS, Jackson AA, Refsum H, Rao S, Fisher DJ, Bhat DS, Naik SS, Coyaji KJ, Joglekar CV, Joshi N, Lubree HG, Deshpande VU, Rege SS, Fall CH. Vitamin B12 and folate concentrations during pregnancy and insulin resistance in the offspring: the Pune Maternal Nutrition Study. *Diabetologia* 2008;51:29-38.

36. Krishnaveni GV, Hill JC, Veena SR, Bhat DS, Wills AK, Karat CL, Yajnik CS, Fall CH. Low plasma vitamin B12 in pregnancy is associated with gestational 'diabesity' and later diabetes. *Diabetologia* 2009;52:2350-8.

37. Lu M, Xu Y, Lv L, Zhang M. Association between vitamin D status and the risk of gestational diabetes mellitus: a meta-analysis. *Arch Gynecol Obstet* 2016; 293:959-66.

38. Asemi Z, Hashemi T, Karamali M, Samimi M, Esmailzadeh A. Effects of vitamin D supplementation on glucose metabolism, lipid concentrations, inflammation, and oxidative stress in gestational diabetes: a double-blind randomized controlled clinical trial. *Am J Clin Nutr* 2013 ;98:1425-32.

39. Bo S Lezo A, Menato G, Gallo ML, Bardelli C, Signorile A, Berutti C, Massobrio M, Pagano GF. Gestational hyperglycemia, zinc, selenium, and antioxidant vitamins. *Nutrition* 2005; 21: 186-91.

40. Schlemmer U, Frolich W, Prieto RM, et al. Phytate in foods and significance for humans: food sources, intake, processing, bioavailability, protective role and analysis. *Mol Nutr Food Res* 2009;53 Suppl 2; S330-375.

41. Clements RS, Diethelm AG. The metabolism of myo-inositol by the human kidney. *J Lab Clin Med* 1979;93: 210-219.

42. Hauser G, Finelli VN. The biosynthesis of free and phosphatide myo-inositol from glucose by mammalian tissue slices. *J Biol Chem* 1963;238: 3224-3228.

43. Croze ML, Soulage CO. Potential role and therapeutic interests of myo-inositol in metabolic diseases. *Biochimie* 2013;95: 1811-1827.

44. Coustan DR. Can a dietary supplement prevent gestational diabetes mellitus? *Diabetes Care* 2013;36:777-779.

45. Croze ML, Soulage CO. Potential role and therapeutic interests of myo-inositol in metabolic diseases. *Biochimie* 2013;95: 1811-1827.

46. D'Anna R, Scilipoti A, Giordano D, Caruso C, Cannata ML, Interdonato ML, Corrado F, Di Benedetto A. myo-Inositol supplementation and onset of gestational diabetes mellitus in pregnant women with a family history of type 2 diabetes: a prospective, randomized, placebo-controlled study. *Diabetes Care* 2013;36:854-7.

47. Corrado F, D'Anna R, Di Vieste G, Giordano D, Pintaudi B, Santamaria A, Di Benedetto A. The effect of myo-inositol supplementation on insulin resistance in patients with gestational diabetes. *Diabet Med* 2011;28:972-5.

48. D'Anna R, Di Benedetto V, Rizzo P, Raffone E, Interdonato ML, Corrado F, Di Benedetto A. Myo-inositol may prevent gestational diabetes in PCOS women. *Gynecol Endocrinol* 2012;28:440-2.
49. Matarrelli B, Vitacolonna E, D'angelo M, Pavone G, Mattei PA, Liberati M, Celentano C. Effect of dietary myo-inositol supplementation in pregnancy on the incidence of maternal gestational diabetes mellitus and fetal outcomes: a randomized controlled trial. *J Matern Fetal Neonatal Med* 2013;26:967-72.
50. Cani PD, Geurts L, Matamoros S, Plovier H, Duparc T. Glucose metabolism: Focus on gut microbiota, the endocannabinoid system and beyond. *Diabetes Metab.* 2014; 40:246-57.
51. Isolauri E, Rautava S, Collado MC, Salminen S. Role of probiotics in reducing the risk of gestational diabetes. *Diabetes Obesity Metab* 2015;17:713-719.
52. Luoto R, Laitinen K, Nermes M, Isolauri E. Impact of maternal probiotic-supplemented dietary counselling on pregnancy outcome and prenatal and postnatal growth: a double-blind, placebo-controlled study. *Br J Nutr* 2010;103:1792-9.
53. Catalano P, deMouzon SH. Maternal obesity and metabolic risk to the offspring: why lifestyle interventions may have not achieved the desired outcomes. *Int J Obes* 2015;39:642-9.
54. Norwegian Scientific Committee for Food Safety. <http://www.english.vkm.no/dav/dcbbd8d80c.pdf>
55. Kumar R, Ouyang F, Story RE, Pongracic JA, Hong X, Wang G, Pearson C, Ortiz K, Bauchner H, Wang X. Gestational diabetes, atopic dermatitis, and allergen sensitization in early childhood. *J Allergy Clin Immunol* 2009;124:1031-8.
56. Lawlor DA, Wills AK, Fraser A, Sayers A, Fraser WD, Tobias JH. Association of maternal vitamin D status during pregnancy with bone-mineral content in offspring: a prospective cohort study. *Lancet.* 2013;381:2176-83.
57. [http://www.cdc.gov/preconception/documents/clinical-content\\_womensnutritionfactsheet3.pdf](http://www.cdc.gov/preconception/documents/clinical-content_womensnutritionfactsheet3.pdf)

**Table 1. Constituents of the intervention and control drinks**

| <b>Intervention group</b>             | <b>Daily amount</b>                                            | <b>Rationale</b>                                                                                                                                                                                                                                                                                                                                     |
|---------------------------------------|----------------------------------------------------------------|------------------------------------------------------------------------------------------------------------------------------------------------------------------------------------------------------------------------------------------------------------------------------------------------------------------------------------------------------|
| Myo-inositol                          | 4 g                                                            | Improves glucose metabolism and preliminary data suggest may maintain healthy glucose metabolism in pregnancy; dose safely used in pregnancy.                                                                                                                                                                                                        |
| Vitamin D3                            | 400 IU                                                         | Deficiency highly prevalent and linked with glucose metabolism in pregnancy and offspring postnatal adiposity gain; dose sufficient to reduce insufficiency while avoiding potential concerns re adverse effects at high doses. Omission from control group supported by a Lancet study [56].                                                        |
| Vitamin B6                            | 2.6 mg                                                         | Deficiency highly prevalent and linked with glucose metabolism in pregnancy and offspring postnatal adiposity gain [33]; dose sufficient to rectify deficiency and present in current over the counter products (e.g. Elevit). Omission from control group supported by usual clinical practice.                                                     |
| Vitamin B12                           | 5.2 µg                                                         | Deficiency highly prevalent and linked with glucose metabolism in pregnancy and offspring postnatal adiposity gain; dose sufficient to rectify deficiency and less than that in current over the counter products (e.g. Elevit). Omission from control group supported by usual clinical practice.                                                   |
| Riboflavin                            | 1.8 mg                                                         | Low intake highly prevalent and linked with offspring postnatal adiposity gain [34]; dose sufficient to rectify deficiency and present in current over the counter products (e.g. Elevit). Omission from control group supported by usual clinical practice.                                                                                         |
| Zinc                                  | 10 mg                                                          | Deficiency highly prevalent and linked with offspring postnatal adiposity gain [unpublished]; dose sufficient to rectify deficiency and present in current over the counter products (e.g. Elevit). Omission from control group supported by usual clinical practice.                                                                                |
| β-carotene                            | 720 µg (15% of vitamin A requirements, as retinol equivalents) | Required in pregnancy in some jurisdictions.                                                                                                                                                                                                                                                                                                         |
| Folic acid                            | 400 µg                                                         | Standard pre-conception recommendation                                                                                                                                                                                                                                                                                                               |
| Iron                                  | 12 mg                                                          | Iron is routinely prescribed and taken before/during pregnancy, though without convincing evidence of benefit; low dose included to lessen likelihood of additionally receiving a high dose iron product, which has been linked with glucose metabolism in pregnancy                                                                                 |
| Calcium                               | 150 mg                                                         | A low dose of calcium is commonly taken before/during pregnancy; provision of this will lessen the likelihood of additional products being taken                                                                                                                                                                                                     |
| Iodine                                | 150 µg                                                         | Standard pre-conception recommendation                                                                                                                                                                                                                                                                                                               |
| Probiotic                             |                                                                | Taking a combination of two probiotics has been linked with maintenance of healthy glucose metabolism in pregnancy. Probiotic capsule containing > 1x10 <sup>9</sup> cfu each of <i>Lactobacillus rhamnosus</i> NCC 4007 (CGMCC 1.3724) also known as LPR and <i>Bifidobacterium animalis sp. lactis</i> NCC 2818 (CNCM I-3446) also known as B1818. |
| <b>Intervention and Control group</b> |                                                                |                                                                                                                                                                                                                                                                                                                                                      |
| Folic acid                            | 400 µg                                                         | Standard pre-conception recommendation                                                                                                                                                                                                                                                                                                               |
| Iron                                  | 12 mg                                                          | Iron is routinely prescribed and taken before/during pregnancy, though without convincing evidence of benefit; low dose included to lessen likelihood of additionally receiving a high dose iron product, which has been linked with glucose metabolism in pregnancy.                                                                                |
| Calcium                               | 150 mg                                                         | A low dose of calcium is commonly taken before/during pregnancy; provision of this will lessen the likelihood of additional products being taken                                                                                                                                                                                                     |
| Iodine                                | 150 µg                                                         | Standard pre-conception recommendation [57]                                                                                                                                                                                                                                                                                                          |
| β-carotene                            | 720 µg (15% of vitamin A requirements, as retinol equivalents) | Required in pregnancy in some jurisdictions.                                                                                                                                                                                                                                                                                                         |

# SPiRiT Figure: Trial Schema

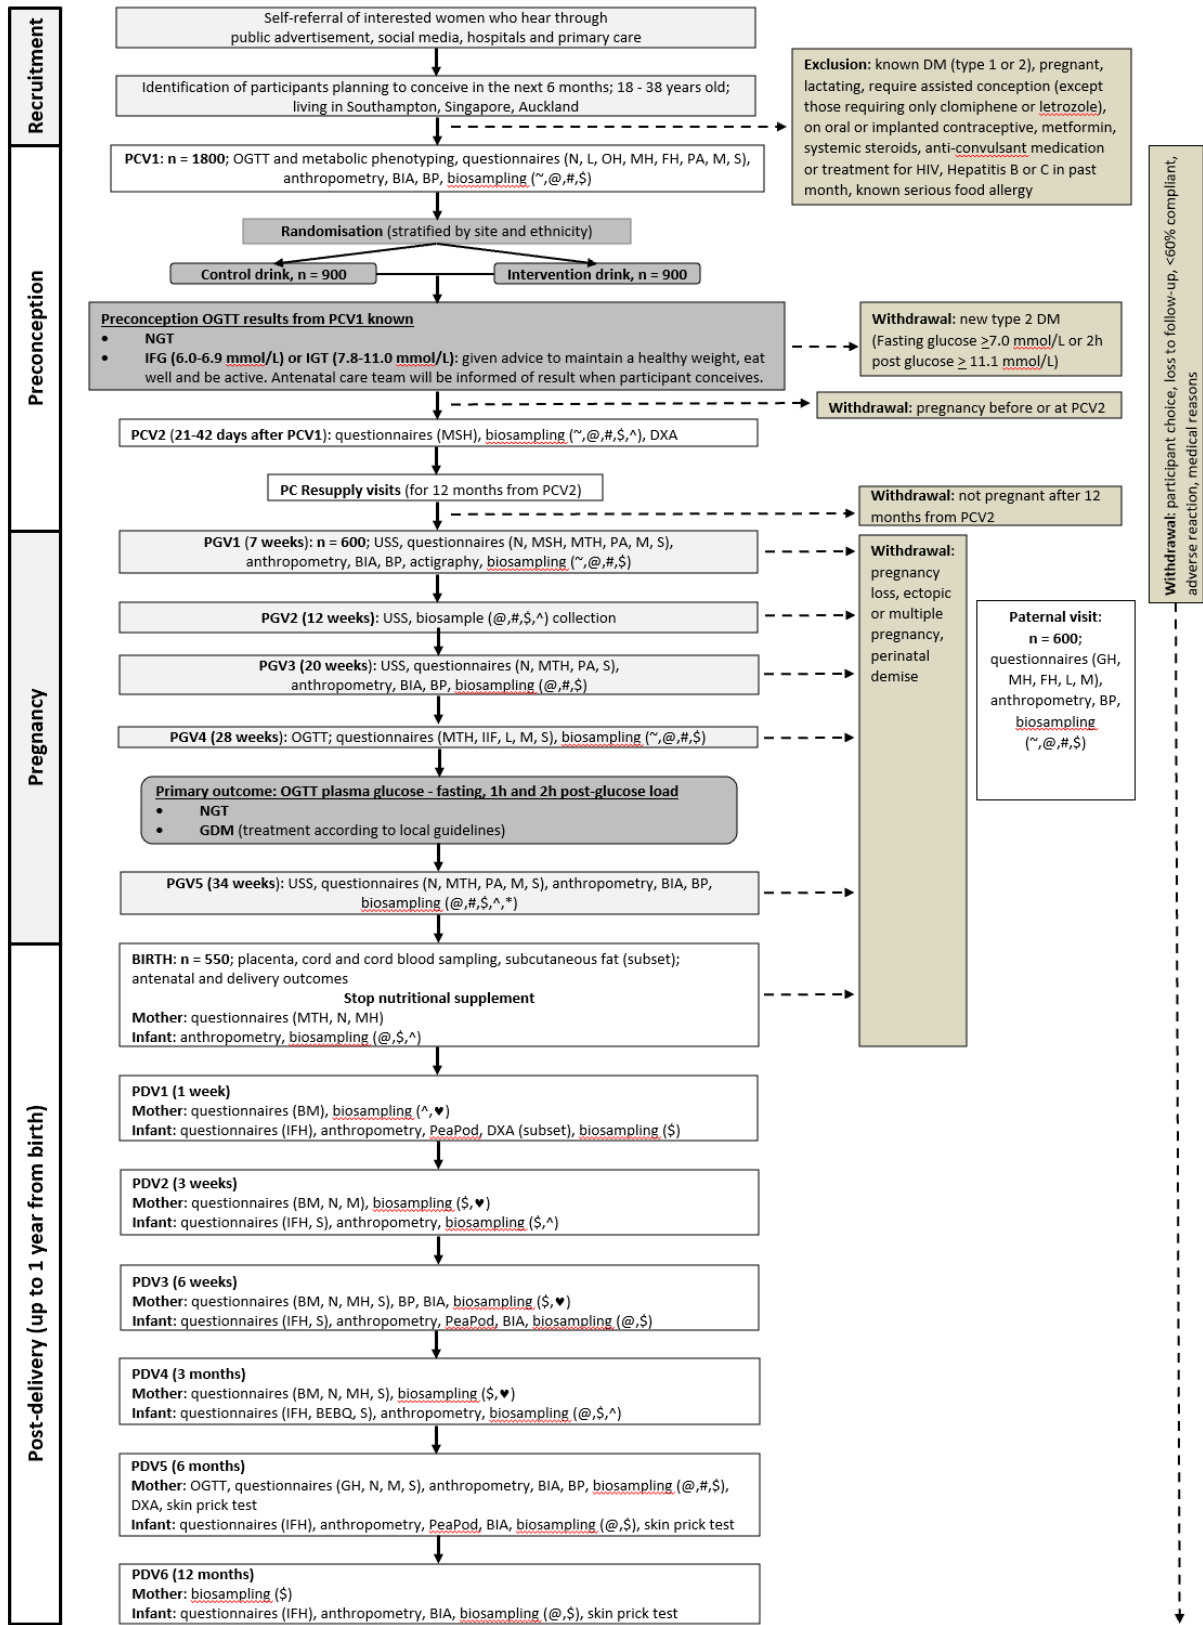

Abbreviations: PCV, Preconception visit; PC, Preconception; PGV, Pregnancy visit; PDV, Post-delivery visit; BIA, Bioelectrical impedance analysis; BP, blood pressure; DM, diabetes mellitus; DXA, dual-energy X-ray absorptiometry; GDM, gestational diabetes; HIV, human immunodeficiency virus; IFG, impaired fasting

glucose; IGT, impaired glucose tolerance; NGT, normal glucose tolerance; OGTT, oral glucose tolerance test; USS, ultrasound scan.

Questionnaires: BEBQ, baby eating behaviour; BM, breast milk; FH, family history; GH, general health; IFH, infant feeding and health; IIF, intentions for infant feeding; L, lifestyle; M, mood (Edinburgh Postnatal Depression Scale, State-Trait Anxiety Inventory); MH, medical history; MSH, menstrual history; MTH, maternal health; N, nutrition/diet; OH, obstetric history; PA, physical activity; S, sleep.

Biosampling: # = blood, ♥ = breast milk, \$ = buccal swabs, \* = epithelial swabs, @ = hair, ^ = stool, ~ = urine
